# Supplementary material for: The association between high ambient temperature and mortality in the Mediterranean basin: a systematic review and meta-analysis
Source: bioRxiv or medRxiv preprint supplement (doi:10.1101/2022.01.20.22269580), 2022-01-21

## Supplementary data

**Table S1:** Köppen climate symbols and description (by levels)

| 1st      | 2nd | 3rd | Description               |
|----------|-----|-----|---------------------------|
| <b>A</b> |     |     | <b>Tropical</b>           |
|          | f   |     | - Rainforest              |
|          | m   |     | - Monsoon                 |
|          | w   |     | - Savannah                |
| <b>B</b> |     |     | <b>Arid</b>               |
|          | W   |     | - Desert                  |
|          | S   |     | - Steppe                  |
|          |     | h   | - Hot                     |
|          |     | k   | - Cold                    |
| <b>C</b> |     |     | <b>Temperate</b>          |
|          | s   |     | - Dry Summer              |
|          | w   |     | - Dry Winter              |
|          | f   |     | - Without Dry Season      |
|          |     | a   | - Hot Summer              |
|          |     | b   | - Warm Summer             |
|          |     | c   | - Cold Summer             |
| <b>D</b> |     |     | <b>Cold (Continental)</b> |
|          | s   |     | - Dry Summer              |
|          | w   |     | - Dry Winter              |
|          | f   |     | - Without Dry Season      |
|          |     | a   | - Hot Summer              |
|          |     | b   | - Warm Summer             |
|          |     | c   | - Cold Summer             |
| <b>E</b> |     |     | <b>Polar</b>              |
|          | T   |     | - Tundra                  |
|          | F   |     | - Frost                   |

**Adapted from:** Peel, M. C., Finlayson, B. L., and McMahon, T. A.: Updated world map of the Köppen-Geiger climate classification, *Hydrol. Earth Syst. Sci.*, 11, 1633–1644, <https://doi.org/10.5194/hess-11-1633-2007>, 2007. *See reference for exact criteria.*

**Table S2:** Characteristics of minimal study spatial units for subgroup and meta-analyses

| <b>Study</b>               | <b>Country</b> | <b>City/region</b> | <b>Latitude</b> | <b>Longitude</b> | <b>Köppen - Geiger climate type</b> | <b>Geographical location</b> |
|----------------------------|----------------|--------------------|-----------------|------------------|-------------------------------------|------------------------------|
| Heaviside, et al. (2016)   | Cyprus         | All Cyprus         | 35.1            | 33.25            | Csa                                 | East Europe                  |
| Baccini, et al. (2008)     | Greece         | Athens             | 37.58           | 23.43            | Csa                                 | East Europe                  |
| Leone, et al. (2013)       | Greece         | Athens             | 37.58           | 23.43            | Csa                                 | East Europe                  |
| Kouis et al. (2019)        | Greece         | Athens             | 37.58           | 23.43            | Csa                                 | East Europe                  |
| Zafeiratou et al. (2019)   | Greece         | Thessaloniki       | 40.39           | 22.54            | Bsk                                 | East Europe                  |
| Peretz, et al. (2012)      | Israel         | Tel Aviv           | 32.04           | 34.47            | Csa                                 | MENA                         |
| Leone, et al. (2013)       | Israel         | Tel Aviv           | 32.04           | 34.47            | Csa                                 | MENA                         |
| Leone, et al. (2013)       | Italy          | Bari               | 41.11           | 16.87            | Cfa                                 | West Europe                  |
| Michelozzi, et al. (2006)  | Italy          | Bologna            | 44.3            | 11.21            | Cfa                                 | West Europe                  |
| Armstrong, et al. (2017)   | Italy          | Italy              | 42.2            | 12.29            | Csa                                 | West Europe                  |
| Michelozzi, et al. (2006)  | Italy          | Milan              | 45.28           | 9.11             | Cfa                                 | West Europe                  |
| Baccini, et al. (2008)     | Italy          | Milan              | 45.28           | 9.11             | Cfa                                 | West Europe                  |
| Muggeo, et al. (2009)      | Italy          | Palermo            | 38.07           | 13.22            | Csa                                 | West Europe                  |
| Leone, et al. (2013)       | Italy          | Palermo            | 38.07           | 13.22            | Csa                                 | West Europe                  |
| Michelozzi, et al. (2006)  | Italy          | Rome               | 41.54           | 12.3             | Csa                                 | West Europe                  |
| Baccini, et al. (2008)     | Italy          | Rome               | 41.54           | 12.3             | Csa                                 | West Europe                  |
| Leone, et al. (2013)       | Italy          | Rome               | 41.54           | 12.3             | Csa                                 | West Europe                  |
| Michelozzi, et al. (2006)  | Italy          | Turin              | 45.04           | 7.42             | Cfa                                 | West Europe                  |
| Baccini, et al. (2008)     | Italy          | Turin              | 45.04           | 7.42             | Cfa                                 | West Europe                  |
| Morabito, et al. (2012)    | Italy          | Tuscany (region)   | 43.77           | 11.24            | Csa                                 | West Europe                  |
| El Zein, et al. (2004)     | Lebanon        | Beirut             | 33.53           | 35.31            | Csa                                 | MENA                         |
| Almeida, et al. (2013)     | Portugal       | Lisbon             | 38.43           | 9.08             | Csa                                 | West Europe                  |
| Burkart, et al. (2013)     | Portugal       | Lisbon             | 38.43           | 9.08             | Csa                                 | West Europe                  |
| Leone, et al. (2013)       | Portugal       | Lisbon             | 38.43           | 9.08             | Csa                                 | West Europe                  |
| Almeida, et al. (2013)     | Portugal       | Porto              | 41.1            | 8.37             | Csb                                 | West Europe                  |
| Baccini, et al. (2008)     | Slovenia       | Ljubljana          | 46.03           | 14.31            | Dfc                                 | West Europe                  |
| McMichael, et al. (2010)   | Slovenia       | Ljubljana          | 46.03           | 14.31            | Dfc                                 | West Europe                  |
| Baccini, et al. (2008)     | Spain          | Barcelona          | 41.23           | 2.11             | Csa                                 | West Europe                  |
| Leone, et al. (2013)       | Spain          | Barcelona          | 41.23           | 2.11             | Csa                                 | West Europe                  |
| Gomez-Acebo, et al. (2012) | Spain          | Cantabria (region) | 43.18           | 3.98             | Cfb                                 | West Europe                  |
| Armstrong, et al. (2017)   | Spain          | Spain              | 40.23           | 3.43             | Bsk                                 | West Europe                  |
| Baccini, et al. (2008)     | Spain          | Valencia           | 39.28           | 0.23             | Bsk                                 | West Europe                  |
| Leone, et al. (2013)       | Spain          | Valencia           | 39.28           | 0.23             | Bsk                                 | West Europe                  |
| Leone, et al. (2013)       | Tunisia        | Tunis              | 36.48           | 10.11            | Csa                                 | MENA                         |

|                        |         |          |       |       |     |             |
|------------------------|---------|----------|-------|-------|-----|-------------|
| Bettaieb et al. (2020) | Tunisia | Tunis    | 36.48 | 10.11 | Csa | MENA        |
| Leone, et al. (2013)   | Turkey  | Istanbul | 41.01 | 28.57 | Csa | East Europe |

**Table S3:** Study characteristics: season, statistical model, exposure, and confounders

| Author (year)             | Season                         | Model                                               | Lag (Days) Used | Confounders                                                                                                                                                                             |
|---------------------------|--------------------------------|-----------------------------------------------------|-----------------|-----------------------------------------------------------------------------------------------------------------------------------------------------------------------------------------|
| El Zein et al. (2004)     | All year                       | Poisson regression                                  | lag 0           | <b>Climate:</b> humidity<br><b>Time related variables:</b> day of the week, holidays, seasonality, year of death                                                                        |
| Michelozzi et al. (2006)  | Hot season: June to September  | Poisson generalized additive model (GAM)            |                 |                                                                                                                                                                                         |
| Baccini et al. (2008)     | Hot season: April to September | Poisson generalized estimating equation model (GEE) | lag 0-3         | <b>Air pollution:</b> NO2 (lag0-1)<br><b>Climate:</b> barometric pressure (lag0-1), wind speed<br><b>Time related variables:</b> holidays, day of week, calendar month, long time trend |
| McMichael, et al. (2008)  | All year                       | Poisson regression                                  | lag 0-1         | <b>Air pollution:</b> particulate concentrations (lag 0-1)<br><b>Climate:</b> humidity<br><b>Time related variables:</b> day of week, public holidays, secular trends, seasonality      |
| Muggeo et al. (2009)      | All year                       | Poisson generalized additive model (GAM)            | lag 0           | <b>Air pollution:</b> PM10, (lag 0-1) O3 (lag 0-1)<br><b>Climate:</b> humidity<br><b>Time related variables:</b> seasonality, long term trends, day of week, influenza                  |
| Gómez-Acebo et al. (2012) | Hot season: June to September  | Poisson regression                                  |                 | <b>Demography:</b> number of inhabitants<br><b>Time related variables:</b> seasonality                                                                                                  |
| Morabito et al. (2012)    | All year                       | Poisson regression                                  | lag 0-1         | <b>Demography:</b> summer population decrement<br><b>Time related variables:</b> Year, season, day of week, holidays                                                                    |
| Peretz et al. (2012)      | All year                       | Poisson regression                                  | lag 0-3         | <b>Air pollution:</b> NO2 (lag 0-1)<br><b>Time related variables:</b> month, day of week                                                                                                |
| Almeida et al. (2013)     | Hot season: April to September | Poisson generalized estimating equation model (GEE) | lag 0-3 (Tmax)  | <b>Air pollution:</b> PM10, barometric pressure, wind speed<br><b>Time related variables:</b> day of the week, holidays, calendar month, long-term time trend                           |

|                          |                                |                                                     |          |                                                                                                                                                                                                                                                                                                                                                                                                                                                                                                                                                                                                |
|--------------------------|--------------------------------|-----------------------------------------------------|----------|------------------------------------------------------------------------------------------------------------------------------------------------------------------------------------------------------------------------------------------------------------------------------------------------------------------------------------------------------------------------------------------------------------------------------------------------------------------------------------------------------------------------------------------------------------------------------------------------|
| Burkart et al. (2013)    | All year                       | Poisson generalized additive model (GAM)            | lag 0-1  | <b>Air pollution:</b> PM10, O3<br><b>Time related variables:</b> trend, year, day of the week                                                                                                                                                                                                                                                                                                                                                                                                                                                                                                  |
| Leone et al. (2013)      | Hot season: April to September | Poisson generalized estimating equation model (GEE) | lag 0-3  | <b>Air pollution:</b> NO2, barometric pressure, wind speed<br><b>Climate:</b> mean, maximum, minimum and standard deviation of temperature and of maximum apparent temperature, mean and standard deviation of relative humidity, latitude and longitude.<br><b>Socioeconomic variables:</b> percentage of elderly population, percentage unemployed, life expectancy at birth, infant mortality rate, population size, GDP per capita, health expenditure, hospital bed density<br><b>Time related variables:</b> holidays, day of the week, calendar month, seasonality and long time trends |
| Heaviside et al. (2016)  | Hot season: April to September | Poisson regression, DLNM                            | lag 0-1  | <b>Air pollution:</b> PM10<br><b>Climate:</b> humidity<br><b>Time related trends:</b> seasonality and long-term trends                                                                                                                                                                                                                                                                                                                                                                                                                                                                         |
| Armstrong et al. (2017)  | All year                       | Poisson regression, DLNM                            | lag 0-21 | <b>Time related trends:</b> seasonality, long term trend, day of week                                                                                                                                                                                                                                                                                                                                                                                                                                                                                                                          |
| Kouis et al. (2019)      | All year                       | Poisson regression, DLNM                            | lag 0-1  | <b>Air pollution:</b> PM10, O3<br><b>Climate:</b> humidity<br><b>Time related trends:</b> seasonal and long-term trends                                                                                                                                                                                                                                                                                                                                                                                                                                                                        |
| Zafeiratou et al. (2019) | Hot season: April to September | Poisson generalized estimating equation model (GEE) | lag 0-3  | Sociodemographic variables: population density, green space (%), density of road network, area covered by buildings, total area, immigrant population from outside EU, unemployment rate, youth unemployment rate, long term unemployment rate, population 25-64 with low secondary/upper secondary/tertiary education, early leavers from education<br><b>Climate:</b> temperature from the E-OBS database<br><b>Time related trends:</b> day of the week, month, seasonality and long term trends                                                                                            |
| Bettaieb et al. (2020)   | Hot season: May to October     | Poisson generalized estimating equation model (GEE) | lag 0-3  | <b>Air pollution:</b> NO2 (lag 0-1)<br><b>Time related variables:</b> trend, calendar month, day of the week, the Ramadan period, public holidays                                                                                                                                                                                                                                                                                                                                                                                                                                              |

In studies reporting multiple lag periods, the estimate for the shortest lag was recorded. DLNM, distributed lag nonlinear models.

\* average thresholds

\*\* pooled thresholds





**Figure S8:** Meta-regression of temperature-mortality associations by local threshold.

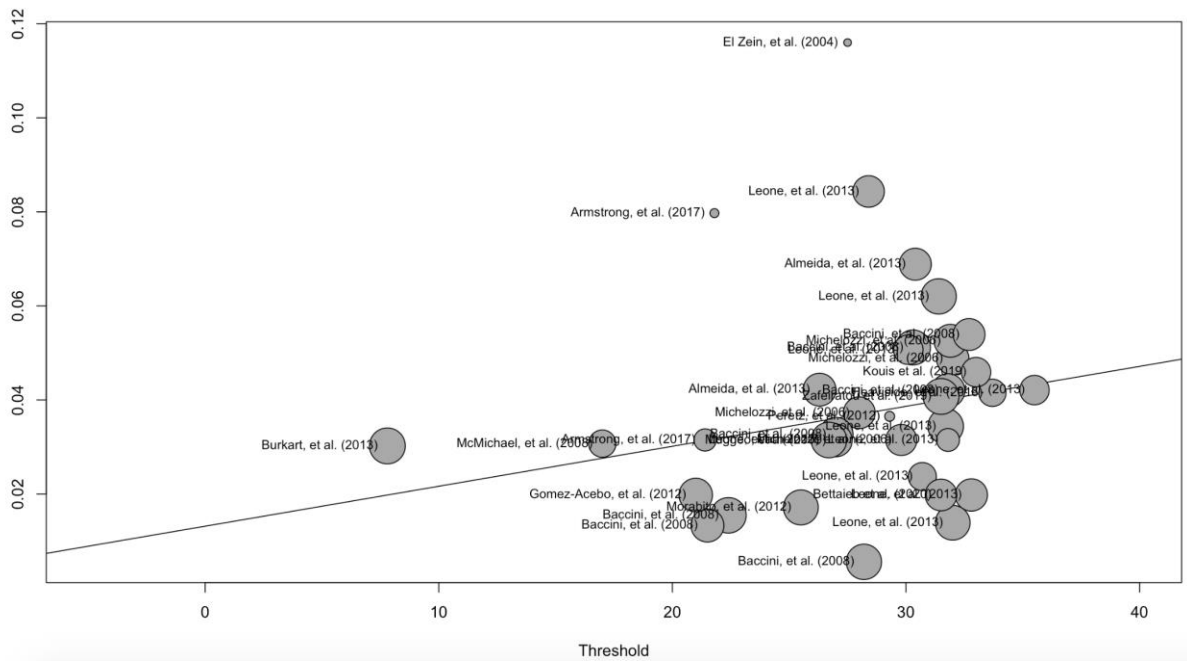

Supplement: Supplementary file [file media-1.pdf]
